# Supplementary material for: CDK1 controls CHMP7-dependent nuclear envelope reformation
Source: eLife. 2021 Jul 21;10:e59999. doi: 10.7554/eLife.59999 (PMC8324300; doi:10.7554/eLife.59999)
Supplement: Figure 1—figure supplement 2—source data 1. [file elife-59999-fig1-figsupp2-data1.xlsx]

## Sheet: Figure 1 S2 Source Data
Figure 1 S2
	HeLa cells stably expressing the indicated LEM2-mCh constructs were scored for LEM2-mCh positive foci or folds at the NE
	E1, E2, E3 indicate independent experiments
			Nuclear Envelope Foci
			LEM2-mCh	LEM2d415-485-mCh
		E1	8.02	36.4
		E2	5.79	33.5
		E3	2.4	32.5
		AVERAGE	5.40333	34.1333
		STDEV	2.82988	2.02567
			Nuclear Envelope Folds
			LEM2-mCh	LEM2d415-485-mCh
		E1	3.2	73.6
		E2	0.72	78.9
		E3	5.6	66.9
		AVERAGE	3.17333	73.1333
		STDEV	2.44011	6.0136
