# Supplementary material for: CDK1 controls CHMP7-dependent nuclear envelope reformation
Source: eLife. 2021 Jul 21;10:e59999. doi: 10.7554/eLife.59999 (PMC8324300; doi:10.7554/eLife.59999)
Supplement: Figure 1—figure supplement 3—source data 1. [file elife-59999-fig1-figsupp3-data1.xlsx]

## Sheet: Figure 1 S3 Source Data
Figure 1 Supplement 3
	Frame	CTRL F/F0 MEAN	CTRL STDEV		IST1si F/F0 MEAN	IST1 STDEV
	0	1	0		1	0
	1	1.23557	0.0291396		1.34711	0.166891
	2	1.60402	0.0158119		1.64627	0.170935
	3	1.94167	0.0680063		1.95069	0.434908
	4	2.12963	0.16297		2.23605	0.571303
	5	2.13576	0.141272		2.27059	0.558631
	6	2.00558	0.0552351		2.25627	0.382894
	7	1.8649	0.0785095		2.18544	0.438798
	8	1.72384	0.0460716		2.1073	0.445189
	9	1.65243	0.03963		2.01382	0.388618
	10	1.57138	0.0666231		1.94979	0.355907
	11	1.50827	0.060728		1.84819	0.3373
	12	1.43844	0.0232996		1.83263	0.330215
	13	1.39318	0.0322609		1.73191	0.270904
	14	1.37114	0.0204724		1.61271	0.255076
	15	1.3565	0.0230665		1.54836	0.255981
	16	1.33896	0.0179718		1.5987	0.286623
	17	1.33049	0.00902071		1.55008	0.27631
	18	1.33293	0.0251515		1.48819	0.301764
	19	1.29109	0.0184573		1.46929	0.238859
	20	1.2899	0.017512		1.44473	0.230969
	21	1.27199	0.0177024		1.39453	0.272592
	22	1.25492	0.00890207		1.40698	0.279204
	23	1.2473	0.0111601		1.35311	0.262207
	24	1.2457	0.000333215		1.29929	0.265687
	25	1.21648	0.0190151		1.31609	0.234969
	26	1.19668	0.0233312		1.31015	0.290776
	27	1.20562	0.0167298		1.30221	0.264589
	28	1.18426	0.02629		1.26309	0.236242
	29	1.18854	0.0186637		1.19691	0.241045
	30	1.18305	0.0267135		1.20119	0.267915
	31	0.884098	0.215374		1.18885	0.231113
	32	0.924652	0.158844		1.11819	0.207166

## Sheet: Figure 1 S3 Readme
Data relating to Figure 1 S3
T = 0 set when NE core was covered by LEM2-mCh positive membrane
Area normalised average intensity calculated in a ROI around the NE at each frame (30 sec intervals)
F/F0 calculated and presented as mean ± SD from n = 25 (control) or n = 11 (IST1 siRNA)
