# Supplementary material for: CDK1 controls CHMP7-dependent nuclear envelope reformation
Source: eLife. 2021 Jul 21;10:e59999. doi: 10.7554/eLife.59999 (PMC8324300; doi:10.7554/eLife.59999)
Supplement: Figure 1—figure supplement 5—source data 1. [file elife-59999-fig1-figsupp5-data1.xlsx]

## Sheet: Figure 1 S5 Source Data
Figure 1 S5
Hela cells stably expressing LEM2-mCh and depleted with the indicated siRNA were scored for HP1 clusters
E1, E2, E3 refer to independent experiments
		HP1 foci per cell, all cells counted
		CTRL si	C7si1	C7si2	IST1si
	E1	5.275	2	1.91	6.14
	E2	6.6	2.79	2.05	6.29
	E3	8.42	2.87	3.12	9.75
	MEAN	6.765	2.55333	2.36	7.39333
	STDEV	1.57898	0.480867	0.661891	2.04231
	SEM	0.911624	0.277629	0.382143	1.17913
		HP1 foci per cell, in CHMP7 depleted cells
		C7si1 smooth	C7si2 smooth	C7si1 clusterd	C7si2 clustered
		2.76	3.29	1.18	0.82
		4.3	2.91	1.55	1.29
		4.38	3.22	1.89	3.11
	MEAN	3.81333	3.14	1.54	1.74
	STDEV	0.91309	0.202237	0.355106	1.2095
	SEM	0.527173	0.116762	0.20502	0.698307
