# Supplementary material for: CDK1 controls CHMP7-dependent nuclear envelope reformation
Source: eLife. 2021 Jul 21;10:e59999. doi: 10.7554/eLife.59999 (PMC8324300; doi:10.7554/eLife.59999)
Supplement: Figure 1—source data 1. [file elife-59999-fig1-data1.xlsx]

## Sheet: Figure 1E Source Data
Figure 1E
	T = 0 set when NE core was covered by LEM2-mCh positive membrane
	Area normalised average intensity calculated in a ROI around the NE at each frame (30 sec intervals)
	F/F0 calculated and presented as mean ± SEM from N = 3
	E1, E2, E3 indicate individual experiements
		E1	E2	E3
	Frame	CTRL F/Fo	CTRL F/Fo	CTRL F/Fo		CTRL MEAN	CTRL STDEV	CTRL SEM
	0	1	1	1		1	0	0
	1	1.25784	1.20259	1.24627		1.23557	0.0291396	0.0168238
	2	1.59303	1.59689	1.62214		1.60402	0.0158119	0.00912901
	3	1.99656	1.86559	1.96284		1.94167	0.0680063	0.0392634
	4	2.31055	1.99435	2.08398		2.12963	0.16297	0.0940911
	5	2.25114	1.97821	2.17794		2.13576	0.141272	0.0815635
	6	2.04412	1.9423	2.03032		2.00558	0.0552351	0.03189
	7	1.94705	1.79062	1.85703		1.8649	0.0785095	0.0453275
	8	1.7049	1.69026	1.77636		1.72384	0.0460716	0.0265994
	9	1.65712	1.61067	1.68952		1.65243	0.03963	0.0228804
	10	1.58566	1.49877	1.6297		1.57138	0.0666231	0.0384649
	11	1.4659	1.48106	1.57784		1.50827	0.060728	0.0350613
	12	1.43514	1.41696	1.46321		1.43844	0.0232996	0.013452
	13	1.36196	1.39118	1.42639		1.39318	0.0322609	0.0186258
	14	1.3475	1.38337	1.38254		1.37114	0.0204724	0.0118197
	15	1.34061	1.34592	1.38295		1.3565	0.0230665	0.0133174
	16	1.31825	1.35049	1.34814		1.33896	0.0179718	0.0103761
	17	1.3273	1.34067	1.32349		1.33049	0.00902071	0.00520811
	18	1.34981	1.34496	1.30402		1.33293	0.0251515	0.0145212
	19	1.30249	1.30098	1.26979		1.29109	0.0184573	0.0106563
	20	1.30077	1.29923	1.2697		1.2899	0.017512	0.0101106
	21	1.2728	1.28927	1.25389		1.27199	0.0177024	0.0102205
	22	1.24465	1.26039	1.25973		1.25492	0.00890207	0.00513962
	23	1.23495	1.25667	1.25028		1.2473	0.0111601	0.00644331
	24	1.24581	1.24597	1.24533		1.2457	0.000333215	0.000192382
	25	1.20875	1.20254	1.23814		1.21648	0.0190151	0.0109783
	26	1.16974	1.20992	1.21037		1.19668	0.0233312	0.0134702
	27	1.18866	1.22211	1.20609		1.20562	0.0167298	0.00965896
	28	1.15609	1.18854	1.20814		1.18426	0.02629	0.0151785
	29	1.17977	1.17588	1.20997		1.18854	0.0186637	0.0107755
	30	1.17543	1.16097	1.21274		1.18305	0.0267135	0.015423
	31	1.12457	0.818769	0.708952		0.884098	0.215374	0.124346
	32	1.10737	0.819401	0.847188		0.924652	0.158844	0.0917085
		E1	E2	E3
	Frame	C7si1 F/Fo	C7si1 F/Fo	C7si1 F/Fo		C7si1 Mean	C7si1 STDEV	C7si1 SEM
	0	1	1	1		1	0	0
	1	1.4342	1.30881	1.21929		1.32076	0.107953	0.0623265
	2	1.71316	1.72439	1.4203		1.61928	0.172416	0.0995447
	3	1.89628	2.07593	1.67177		1.88133	0.202498	0.116912
	4	1.9772	2.39691	1.87262		2.08224	0.277482	0.160204
	5	1.98487	2.52311	2.14935		2.21911	0.275822	0.159246
	6	2.05205	2.60313	2.29704		2.31741	0.276104	0.159409
	7	2.04096	2.56813	2.4114		2.34017	0.27071	0.156295
	8	2.0703	2.61856	2.48436		2.39107	0.285787	0.164999
	9	2.01862	2.6591	2.29238		2.32337	0.321358	0.185536
	10	2.00325	2.67151	2.33069		2.33515	0.334151	0.192922
	11	1.94025	2.63435	2.34937		2.30799	0.348891	0.201432
	12	2.05108	2.60425	2.38725		2.34753	0.278719	0.160918
	13	2.04271	2.66641	2.29667		2.33526	0.31364	0.18108
	14	2.00145	2.67978	2.36346		2.34823	0.33942	0.195964
	15	1.92237	2.58454	2.25585		2.25425	0.331088	0.191153
	16	1.93857	2.59087	2.153		2.22748	0.332463	0.191948
	17	1.89167	2.50607	2.26546		2.22106	0.309596	0.178746
	18	1.87977	2.53577	2.30173		2.23909	0.332455	0.191943
	19	1.82252	2.56256	2.11193		2.16567	0.372939	0.215317
	20	1.78895	2.4616	2.36069		2.20375	0.362748	0.209433
	21	1.74584	2.47746	2.21713		2.14681	0.370845	0.214107
	22	1.68148	2.53534	2.19217		2.13633	0.429661	0.248065
	23	1.79818	2.46412	2.1909		2.15107	0.334753	0.19327
	24	1.72125	2.51305	2.15234		2.12888	0.396423	0.228875
	25	1.68266	2.46678	2.22097		2.12347	0.401052	0.231548
	26	1.65756	2.45084	2.25185		2.12008	0.412731	0.23829
	27	1.63831	2.49183	2.17767		2.1026	0.431685	0.249233
	28	1.63122	2.47055	2.21286		2.10488	0.429957	0.248236
	29	1.60187	2.43558	2.29625		2.11123	0.446592	0.25784
	30	1.58745	2.439	2.3685		2.13165	0.472606	0.272859
	31	1.71233	2.41565			2.06399	0.497316	0.287126
	32	1.72163	2.42116			2.0714	0.494641	0.285581
		E1	E2	E3
	Frame	C7si2 F/Fo	C7si2 F/Fo	C7si2 F/Fo		C7si2 Mean	C7si2 STDEV	C7si2 SEM
	0	1	1	1		1	0	0
	1	1.44192	1.46489	1.43632		1.44771	0.0151349	0.00873812
	2	1.75575	1.72894	1.82935		1.77134	0.0519891	0.0300159
	3	1.96398	2.04792	2.02753		2.01314	0.0437792	0.025276
	4	2.13865	2.23424	2.15374		2.17554	0.0513921	0.0296713
	5	2.19857	2.38312	2.34314		2.30828	0.0970866	0.056053
	6	2.16478	2.38915	2.54605		2.36666	0.191627	0.110636
	7	2.20339	2.45442	2.4233		2.36037	0.136837	0.0790027
	8	2.26383	2.29882	2.24922		2.27062	0.025485	0.0147137
	9	2.21673	2.36398	2.17367		2.25146	0.099797	0.0576178
	10	2.18495	2.26111	2.45212		2.29939	0.13764	0.0794663
	11	2.15555	2.35338	2.39296		2.30063	0.127191	0.0734337
	12	2.15868	2.31267	2.2799		2.25042	0.0811213	0.0468354
	13	2.07979	2.34892	2.25837		2.22903	0.136939	0.0790617
	14	2.08989	2.18389	2.25328		2.17569	0.0820045	0.0473453
	15	2.02418	2.17777	2.25268		2.15154	0.116485	0.0672525
	16	2.01578	2.16494	2.23204		2.13758	0.110693	0.0639089
	17	1.94636	2.17275	2.14404		2.08771	0.123258	0.0711632
	18	1.94083	2.0684	2.34434		2.11786	0.206251	0.119079
	19	1.88158	2.04663	2.18706		2.03842	0.152906	0.0882802
	20	1.816	2.04116	2.20729		2.02148	0.196384	0.113382
	21	1.83307	2.10704	2.15077		2.0303	0.172193	0.0994157
	22	1.79513	2.04862	2.17952		2.00776	0.195425	0.112829
	23	1.83543	2.08767	2.06508		1.99606	0.13957	0.0805807
	24	1.86945	2.08594	1.99609		1.98383	0.108766	0.0627959
	25	1.80378	2.01778	1.96302		1.92819	0.111173	0.064186
	26	1.76721	1.94134	1.84414		1.8509	0.0872655	0.0503828
	27	1.76798	1.9508	2.1248		1.94786	0.178426	0.103014
	28	1.75316	1.97527	2.0496		1.92601	0.154238	0.0890494
	29	1.69991	2.02237	2.09817		1.94015	0.211482	0.122099
	30	1.68747	1.95002	1.92251		1.85334	0.144301	0.083312
	31	1.70052	1.97194	2.13479		1.93575	0.219381	0.12666
	32	1.69313	1.92707	2.02054		1.88024	0.16865	0.0973702

## Sheet: Figure 1G Source Data
Figure 1G
	Cells stably expressing LEM2-mCh stained with tubulin to iudentify presence or not of midbody
	100 cells per condition scored for LEM2 clusters
		Interphase cells displaying LEM2 clusters
		CTRL	C7si1	C7si2	IST1si
	E1	3	36	28	5
	E2	3	49	33	11
	E3	5	40	37	9
	Mean	3.66667	41.6667	32.6667	8.33333
	STDEV	1.1547	6.65833	4.50925	3.05505
		Cells with midbody displaying LEM2 clusters
		CTRL	C7si1	C7si2	IST1si
	E1	3	96	99	2
	E2	1	83	96	9
	E3	3	94	98	4
	Mean	2.33333	91	97.6667	5
	STDEV	1.1547	7	1.52753	3.60555

## Sheet: Figure 1I Source Data
Figure 1I
	Nucleocytoplasmic ratio of GFP-NLS calculated from cells treated with the indicated siRNA
	CHMP7-depleted cells were binned into those displaying clusters of LEM2, or with smooth NE staining of LEM2
	E1, E2, E3 indicated independent experiments
		CTRL si	C7si1 (Sm)	C7si1 (Clust)	C7si2 (Sm)	C7si2 (Clust)	IST1si
	E1	3.49208	3.57949	1.60595	3.84254	1.49325	3.90658
	E2	4.53835	3.74071	1.56984	4.2732	1.54058	4.10705
	E3	4.87972	3.60301	1.64292	3.01612	1.66512	4.08745
	MEAN	4.30338	3.64107	1.60624	3.71062	1.56632	4.03369
	STDEV	0.723044	0.0870914	0.0365422	0.638838	0.0887783	0.110519
