# Supplementary material for: CDK1 controls CHMP7-dependent nuclear envelope reformation
Source: eLife. 2021 Jul 21;10:e59999. doi: 10.7554/eLife.59999 (PMC8324300; doi:10.7554/eLife.59999)
Supplement: Figure 2—figure supplement 1—source data 1. [file elife-59999-fig2-figsupp1-data1.xlsx]

## Sheet: Figure 2 S1C Source Data
Figure 2 S1C
Nucleocytoplasmic distribution of GFP-CHMP7 C-terminal constructs with indicated NES mutations
E1, E2, E3 refer to the means from independent experiments
		GFP	GFP 393-CT	GFP 393-CT	GFP 377-CT	GFP 377-CT	GFP 377-CT
				NES2-		NES2-	NES1-, NES2-
	E1	1.27313	0.0996963	1.74717	0.0376408	0.512357	1.77758
	E2	1.51578	0.098468	1.66077	0.0512493	0.604734	1.81109
	E3	1.52047	0.0891639	1.70311	0.056303	0.510826	1.93571
	MEAN	1.43646	0.0957761	1.70368	0.0483977	0.542639	1.84146
	STDEV	0.141464	0.00575915	0.0431992	0.00965238	0.0537813	0.0833251
	SEM	0.0816741	0.00332505	0.0249411	0.0055728	0.0310506	0.0481078

## Sheet: Figure 2 S1E Source Data
Figure 2 S1E
HeLa cells stably expressing GFP-CHMP7 were treated with LMB for 4h
E1, E2, E3 refer to the means from independent experiments
		Vehicle	LMB, 10ng/ml
	E1	0.125193	0.537783
	E2	0.333512	0.513996
	E3	0.218554	0.337544
	MEAN	0.225753	0.463108
	STDEV	0.104346	0.10939
	SEM	0.060244	0.0631562

## Sheet: Figure 2 S1F Source Data
Figure 2 S1F
HeLa cells expressing the indicated GFP-CHMP7 constructs, either WT or containing inactivations in the NES in helix6 (NES2-) or helix 5 and 6 (NES1-, NES2-) were scored
E1, E2, E3 refer to the means from independent experiments
Scoring was for ER/cytosol CHMP7 (normal), some localisation to the nucleus, but less than the ER (nuc<ER), localisation to the nucleus, now brighter than the ER (nuc>ER) and localising to the nucleus and forming nuclear and nuclear envelope clusters.
		GFP-CHMP7					GFP-CHMP7 NES2-					GFP-CHMP7 NES1-, NES2-
		Normal	Nuc<ER	Nuc>ER	Clusters		Normal	Nuc<ER	Nuc>ER	Clusters		Normal	Nuc<ER	Nuc>ER	Clusters
	E1	100	0	0	0		0	100	0	0		0	10.2564	46.1538	53.8462
	E2	100	0	0	0		0	100	0	0		0	4.44444	53.3333	46.6667
	E3	100	0	0	0		0	100	0	0		0	0	46.6667	36.6667
	MEAN	100	0	0	0		0	100	0	0		0	4.90028	48.7179	45.7265
	STDEV	0	0	0	0		0	0	0	0		0	5.14338	4.00526	8.62825
	SEM	0	0	0	0		0	0	0	0		0	2.96953	2.31244	4.98152
