# Supplementary material for: CDK1 controls CHMP7-dependent nuclear envelope reformation
Source: eLife. 2021 Jul 21;10:e59999. doi: 10.7554/eLife.59999 (PMC8324300; doi:10.7554/eLife.59999)
Supplement: Figure 2—figure supplement 2—source data 1. [file elife-59999-fig2-figsupp2-data1.xlsx]

## Sheet: Figure 2 S2 Source Data
Figure 2 S2
Pull down of YFP-VPS4 MIT-domain by the indicated GST constructs was quantified. Note, data from a 3rd repeat showed the same trend but was not quatified as it was obtained from film rather than infrared imaging
E1, E2, E3 refer to independent experiments
		GST	GST C7 393-CT	GST C7 393-CT + MIM	GST C7 393-CT ES-RR
	E1	Film	Film	Film	Film
	E2	0.137457	0.103093	0.360825	1
	E3	0.0165378	0.0101689	0.295372	1
	MEAN	0.0769974	0.0566309	0.328098	1
	STDEV	0.0855028	0.0657071	0.0462821	0
