# Supplementary material for: CDK1 controls CHMP7-dependent nuclear envelope reformation
Source: eLife. 2021 Jul 21;10:e59999. doi: 10.7554/eLife.59999 (PMC8324300; doi:10.7554/eLife.59999)
Supplement: Figure 2—source data 1. [file elife-59999-fig2-data1.xlsx]

## Sheet: Figure 2 Source Data
Figure 2
Nucleocytoplasmic distribution of CHMP7-depleted HeLa cells expressing either GFP-CHMP7R or GFP-CHMP7R delta-Helix6 was calculated
E1, E2, E3 refer to independent experiments
		GFP-CHMP7	GFP-CHMP7 dHelix6
	E1	0.303123	0.497119
	E2	0.155209	0.385401
	E3	0.0893549	0.552393
	MEAN	0.182563	0.478305
	STDEV	0.109478	0.085071
	SEM	0.0632071	0.0491157
