# Supplementary material for: CDK1 controls CHMP7-dependent nuclear envelope reformation
Source: eLife. 2021 Jul 21;10:e59999. doi: 10.7554/eLife.59999 (PMC8324300; doi:10.7554/eLife.59999)
Supplement: Figure 3—source data 1. [file elife-59999-fig3-data1.xlsx]

## Sheet: Figure 3 Source Data
Figure 3
GFP-CHMP7 dHelix6 puncta disassembly during M-exit
N = 9, n = 59
T = 0 set at metaphase
Fluoresece intensities normalised to max, pre NEBD
		Average GFP-CHMP7 dHelix6 puncta intesity
		E1	E2	E3	E4	E5	E6	E7	E8	E9		MEAN	STDEV	SEM
	-60	0.982443	1.08362	0.973755	0.925922	1.01657	1.01255	0.9982	1.02025	0.9734		0.998523	0.0433171	0.014439
	-50	1.13743	1.02057	0.972312	0.987211	1.02329	1.01364	1.00407	1.00862	1.00262		1.01886	0.0472541	0.0157514
	-40	1.20133	1.08098	0.99358	1.00872	0.992621	1.01146	0.98848	1.00864	1.01894		1.03386	0.0685933	0.0228644
	-30	1.19258	1.11158	0.982911	0.999261	0.996346	1.0019	1.00281	1.00352	1.00922		1.03335	0.0706598	0.0235533
	-20	1	1	1	1	1	1	1	1	1		1	0	0
	-10	0.301314	0.842819	0.568714	0.617921	0.469896	0.392384	0.647691	0.847095	0.555521		0.582595	0.184421	0.0614736
	0	0	0.85163	0.143996	0.460911	0.177698	0.387323	0.230834	0.324042	0.347212		0.324849	0.242162	0.0807208
	10	0	0	0.144283	0	0	0	0	0.312615	0.338544		0.0883824	0.142677	0.0475591
	20	0	0	0.13942	0	0	0	0	0.199742	0.314708		0.0726523	0.117724	0.0392412
	30	0	0	0.137327	0	0	0	0	0.175878	0.109691		0.0469885	0.0724161	0.0241387
	40	0	0	0.131314	0	0	0	0	0	0.114938		0.0273614	0.0544476	0.0181492
	50	0	0	0.128064	0	0	0	0	0	0.0983376		0.0251557	0.050467	0.0168223
	60	0	0	0	0	0	0	0	0	0.0939631		0.0104403	0.031321	0.0104403
