# Supplementary material for: CDK1 controls CHMP7-dependent nuclear envelope reformation
Source: eLife. 2021 Jul 21;10:e59999. doi: 10.7554/eLife.59999 (PMC8324300; doi:10.7554/eLife.59999)
Supplement: Figure 4—figure supplement 1—source data 1. [file elife-59999-fig4-figsupp1-data1.xlsx]

## Sheet: Figure 4_S1B
Figure 4_S1B
Recombinant HA-LEM2CT or CHMP7 were incubated alone or mixed and subject to a sedimentation assay
N = 5, Fraction of recovered protein presented
		LEM2 alone		CHMP7 alone		CHMP7 + HA-LEM2CT
		LEM2 recovered	CHMP7 recovered	LEM2 recovered	CHMP7 recovered	LEM2 recovered	CHMP7 recovered
	E1	0.0909795	NA	NA	0.564197	0.140798	0.517652
	E2	0.0942565	NA	NA	0.555414	0.157962	0.512946
	E3	0.0183394	NA	NA	0.56512	0.290082	0.557267
	E4	0.039028	NA	NA	0.591236	0.243017	0.544735
	E5	0.0174719	NA	NA	0.540671	0.287487	0.554455
	MEAN	0.052015			0.563328	0.223869	0.537411
	STDEV	0.038074			0.018431	0.0707859	0.0207808

## Sheet: FIgure4_S1D
Figure 4_S1D
Recombinant HA-LEM2CT was incubated alone or mixed with the indicated CHMP7 protein and subject to a sedimentation assay
N = 5, Fraction of recovered protein presented
		HA-LEM2CT recovered with:
		Nothing	CHMP7	CHMP7 S3D/S441D	CHMP7 S3E/S441E
	E1	0.0909795	0.140798	0.167755	0.116962
	E2	0.0942565	0.157962	0.0364299	0.053455
	E3	0.0183394	0.290082	0.03368	0.0570261
	E4	0.039028	0.243017	0.0493364	0.0336792
	E5	0.0174719	0.287487	0.0741005	0.0875467
	MEAN	0.052015	0.223869	0.0722604	0.0697338
	STDEV	0.038074	0.0707859	0.0557236	0.0326888
