# Supplementary material for: CDK1 controls CHMP7-dependent nuclear envelope reformation
Source: eLife. 2021 Jul 21;10:e59999. doi: 10.7554/eLife.59999 (PMC8324300; doi:10.7554/eLife.59999)
Supplement: Figure 4—source data 1. [file elife-59999-fig4-data1.xlsx]

## Sheet: Figure 4B Source Data
Figure 4B
Recombinant CHMP7 was recovered from a sedimentation assay in which CDK1 and Cyclin B were added with or without ATP
N = 4
		Percentage of CHMP7 in
		insoluble fraction					CHMP7		phospho CHMP7
		No ATP	With ATP				Sup	Pellet	Sup	Pellet
	E1	0.508757	0.237918			E1	56.1	58.1	123	38.4
	E2	0.351908	0.138776			E2	10.7	5.81	8.44	1.36
	E3	0.603343	0.401396			E3	26.1	39.7	34.3	23
	E4	0.610795	0.393822			E4	13.7	21.5	15.7	10.2
	MEAN	0.518701	0.292978
	STDEV	0.120505	0.127455

## Sheet: Figure 4D Source Data
Figure 4D
Recombinant CHMP7 of CHMP7 S3D/S441D was recovered from a sedimentation assay
N = 8
			Fraction of CHMP7 in insoluble fraction
		WT	S3D/S441D	S3E/S441E
	E1	0.414136	0.255169	0.361541
	E2	0.564197	0.369177	0.485566
	E3	0.555414	0.346664	0.510747
	E4	0.56512	0.437034	0.262932
	E5	0.591236	0.471788	0.378007
	E6	0.540671	0.370751	0.281126
	E7	0.61026	0.454868	0.378831
	E8	0.721676	0.421011	0.445602
	MEAN	0.538462	0.312173	0.423554
	STDEV	0.0630989	0.0806159	0.0876992

## Sheet: Figure 4F Source Data
Figure 4F
Recombinant HA-LEM2CT was mixed with CHMP7 or CHMP7 that had been phosphorylated by CDK1, and recovered from an immunoprecipitation using anti-CHMP7-Dynabeads
N = 7
									HA-LEM2CT recovered/
									CHMP7 recovered
		ATP	LEM2CT recovered	CHMP7 recovered	Ratio	Normalised			No ATP	With ATP
	E1	-	14231.4	25118	0.566581	1		E1	1	0.39059
		+	5193	23465.8	0.221301	0.39059		E2	1	0.862453
	E2	-	7575.25	13316.3	0.56887	1		E3	1	0.918454
		+	4682.71	9544.4	0.490624	0.862453		E4	1	0.344358
	E3	-	6911.54	11889.3	0.581325	1		E5	1	0.967083
		+	3310.64	6200.62	0.533921	0.918454		E6	1	0.696416
	E4	-	1483.13	18184	0.0815627	1		E7	1	0.668048
		+	516.263	18381	0.0280868	0.344358
	E5	-	16386.6	14536.2	1.1273	1		MEAN	1	0.628964
		+	12053.6	11056.5	1.09019	0.967083		STDEV	0	0.303394
	E6	-	15643.3	14107.8	1.10885	1
		+	8880.77	11500.3	0.772218	0.696416
	E7	-	17237.9	20593.9	0.837036	1
		+	9007.6	16108.6	0.55918	0.668048

## Sheet: Figure 4H Source Data
Figure 4H
Recombinant HA-LEM2CT was mixed with CHMP7 or CHMP7 S3D/S441D and recovered from an immunoprecipitation using anti-CHMP7-Dynabeads
N = 6, DD normalised to matched WT
		Fraction of HA-LEM2CT
		recovered with CHMP7
		WT	S3D/S441D
	E1	1	0.0306297
	E2	1	0.0267402
	E3	1	0.062516
	E4	1	0.08125
	E5	1	0.107705
	E6	1	0.172014
	MEAN	1	0.0801425
	STDEV	0	0.054434
