# Supplementary material for: CDK1 controls CHMP7-dependent nuclear envelope reformation
Source: eLife. 2021 Jul 21;10:e59999. doi: 10.7554/eLife.59999 (PMC8324300; doi:10.7554/eLife.59999)
Supplement: Figure 5—figure supplement 1—source data 1. [file elife-59999-fig5-figsupp1-data1.xlsx]

## Sheet: Figure 5 S1D Source Data
Figure 5 S1D
Duration of assembly at the reforming monopolar NE (in minutes)
E1 - E9 represet the means from up to 9 independent experiments
		STLC	STLC	STLC	Nocodazole	Synnchronising agent
		LEM2-mCh	GFP-CHMP7	mNG-CHMP7+/+	mNG-CHMP7+/+	Cell line
	E1	3.6	3.46	2.4	2.8
	E2	4.29	3.3	2.61538	2
	E3	4.43	3.2	2.75	4.875
	E4			2.92857	4.5
	E5			3.5	8.44444
	E6			3.27273	5.5
	E7			2.8	6.625
	E8			3.78571
	E9			3.07895
	MEAN	4.10667	3.32	3.01459	4.96349
	STDEV	0.444335	0.131149	0.441811	2.19283
	SEM	0.256537	0.0757188	0.14727	0.828813

## Sheet: Figure 5 S1G Source Data
Figur 5 S1G
Quantification of cells displaying clustered LEM2-mCh at the indicated times post release from a monopolar spindle arrest
E1 - E9 represet the means from up to 9 independent experiments
		Cells with disaggregated LEM2-mCh (%)
		30	30	60		Time after RO-3306 treatment
		CTRL	C7si1	C7si1		siRNA
	E1	100	0	25
	E2	94.7368	0	15.3846
	E3	100	0	0
	E4	77.7778	0	15.3846
	E5	91.6667	0	50
	E6	100	0	30.7692
	E7	100	0	0
	E8	92.8571	0	0
	E9		0	13.3333
	MEAN	94.6298	0	16.6524
	STDEV	7.66514	0	16.6852
	SEM	2.71004	0	5.56173
