# Supplementary material for: CDK1 controls CHMP7-dependent nuclear envelope reformation
Source: eLife. 2021 Jul 21;10:e59999. doi: 10.7554/eLife.59999 (PMC8324300; doi:10.7554/eLife.59999)
Supplement: Figure 5—figure supplement 2—source data 1. [file elife-59999-fig5-figsupp2-data1.xlsx]

## Sheet: Figure 5 S2C Source Data
Figure 5 S2C
Calculation of the percentage of GFP-CHMP7 that is phosphorylated at the indicated times post RO-3306 addition using PhosTag gels
		Percentage phosphorylated					Percentage phosphorylated
		Chromatin associated fraction					Extra-chromatin-associated fraction
		MEAN	STDEV	SEM			MEAN	STDEV	SEM
	Interphase	0.012364	0.024728	0.012364		Interphase	0.0259371	0.0449244	0.0311975
	T = 0 (M)	0.773085	0.104888	0.0524439		T = 0 (M)	0.974611	0.0235812	0.0163758
	T = 10	0.721279	0.094346	0.047173		T = 10	0.950281	0.0187916	0.0130497
	T = 15	0.507947	0.194006	0.0970032		T = 15	0.930552	0.067434	0.0468291
	T = 20	0.371838	0.12858	0.0642901		T = 20	0.842918	0.0150331	0.0104397
	T = 25	0.172401	0.142118	0.0710591		T = 25	0.659397	0.0584674	0.0406024
	T = 30	0.00698392	0.0139678	0.00698392		T = 30	0.101245	0.0766255	0.0532121

## Sheet: Figure 5 S2G Source Data
Figure 5 S2C
Analysis of the siRNA sensitivity of two antisera raised against CHMP7 pSer3
The background-corrected intesity of the mitotic extra-chromatin signal was ratioed against the background-corrected intesity of the interphase nuclear signal in adjacent cells.
		a-3891					a-3892
		CTRL	C7si1	C7si2			CTRL	C7si1	C7si2
	MEAN	1	1.00952	1.09715		MEAN	1	0.616803	0.573476
	STDEV	0.208612	0.150725	0.121006		STDEV	0.306153	0.137043	0.12523
