# Supplementary material for: CDK1 controls CHMP7-dependent nuclear envelope reformation
Source: eLife. 2021 Jul 21;10:e59999. doi: 10.7554/eLife.59999 (PMC8324300; doi:10.7554/eLife.59999)
Supplement: Figure 5—figure supplement 3—source data 1. [file elife-59999-fig5-figsupp3-data1.xlsx]

## Sheet: Figure 5 S3B Source Data
Figure 5 S3B
Calculation of the percentage of GFP-CHMP7 that is phosphorylated at the indicated times post RO-3306 addition using PhosTag gels
E1, E2, E3, E4 refer to means of 3 (or 4) independent experiments
		Metaphase cells with puncta				Interphase cells with puncta
		WT	AA			WT	AA
	E1	5.26316	66.6667		E1	1.72414	28.8976
	E2	35.5556	71.4286		E2	1.35135	20.5324
	E3	25	70		E3	0	20.5134
	E4		68.1818		E4	0	18.9474
	MEAN	21.9396	69.0693		MEAN	0.768872	22.2227
	STDEV	15.3763	2.08108		STDEV	0.900767	4.5115
	SEM	8.87754	1.04054		SEM	0.450383	2.25575
