# Supplementary material for: CDK1 controls CHMP7-dependent nuclear envelope reformation
Source: eLife. 2021 Jul 21;10:e59999. doi: 10.7554/eLife.59999 (PMC8324300; doi:10.7554/eLife.59999)
Supplement: Figure 5—source data 1. [file elife-59999-fig5-data1.xlsx]

## Sheet: Figure 5C Source Data
Figure 5C
Onset time of assembly at the reforming monopolar NE after RO-3306 addition
E1 - E9 represet the means from up to 9 independent experiments
		STLC	STLC	STLC	Nocodazole	Synnchronising agent
		LEM2-mCh	GFP-CHMP7	mNG-CHMP7+/+	mNG-CHMP7+/+	Cell line
	E1	17.92	18.26	16.5333	18.1
	E2	15.96	15.88	17.5769	19.5
	E3	14.77	16.65	17.5625	13.75
	E4			16.5	16
	E5			15.55	14.6667
	E6			16.7273	16
	E7			15.6	14.875
	E8			15.2143
	E9			15.6053
	MEAN	16.2167	17.07	16.3188	16.3361
	STDEV	1.59061	1.68291	0.881205	2.13647
	SEM	0.918338	0.971631	0.293735	0.807509

## Sheet: Figure 5F Source Data
Figure 5F
Intensity of GFP-CHMP7 at nuclear envelope, relative to the ER, during NE reformation
E1, E2, E3 refer to the means of 3 independent experiements
		GFP-CHMP7 intensity at the NE
		WT	S3A/S441A	S3D/S441D
	E1	2.41952	2.49162	1.53907
	E2	3.28924	4.04937	1.71039
	E3	4.02946	3.72455	1.79025
	MEAN	3.24608	3.42185	1.6799
	STDEV	0.805835	0.821807	0.128337
	SEM	0.465249	0.47447	0.0740951

## Sheet: Figure 5G Source Data
Figure 5G
Intensity of GFP-CHMP7 at nuclear envelope, relative to the ER, during NE reformation
E1, E2, E3 refer to the means of 3 independent experiements
		Cleavage furrow ingression ratio at maximal recruitment
		WT	S3A/S441A	S3D/S441D
	E1	0.64835	0.516878	0.282098
	E2	0.600046	0.675974	0.403011
	E3	0.665617	0.718462	0.52729
	MEAN	0.638004	0.637104	0.404133
	STDEV	0.0339876	0.106265	0.1226
	SEM	0.0196227	0.061352	0.0707831
