# Supplementary material for: CDK1 controls CHMP7-dependent nuclear envelope reformation
Source: eLife. 2021 Jul 21;10:e59999. doi: 10.7554/eLife.59999 (PMC8324300; doi:10.7554/eLife.59999)
Supplement: Figure 6—figure supplement 1—source data 1. [file elife-59999-fig6-figsupp1-data1.xlsx]

## Sheet: Figure 6 S1 Source Data
Figure 6 S1A
HeLa cells stable expressing GFP-NLS and LEM2-mCh were transected with the indicated siRNA and later with the inndicated rescue plasmid. Nuclear compartmentalisation in HA-positive cells were scored
E1, E2, E3 are means of 3 independent experiments
	siRNA	CTRL	C7si1	C7si1	C7si1	C7si1	C7si1
	Rescue			HA-CHMP7r	HA-CHMP7r	HA-CHMP7r	HA-CHMP7r
					S3A/S441A	S3D/S441D	S3E/S441E
	E1	3.89603	2.01944	3.75161	2.70681	4.30311	3.42716
	E2	4.62897	2.0827	3.73797	3.08214	3.68468	3.28237
	E3	4.94062	1.667	3.42325	3.198	3.644	3.78727
	MEAN	4.48854	1.92305	3.63761	2.99565	3.87726	3.49893
	STDEV	0.536269	0.223987	0.185767	0.256765	0.369357	0.259988
	SEM	0.309615	0.129319	0.107253	0.148243	0.213248	0.150104
