# Supplementary material for: CDK1 controls CHMP7-dependent nuclear envelope reformation
Source: eLife. 2021 Jul 21;10:e59999. doi: 10.7554/eLife.59999 (PMC8324300; doi:10.7554/eLife.59999)
Supplement: Figure 6—source data 1. [file elife-59999-fig6-data1.xlsx]

## Sheet: Figure 6 S1 Source Data
Figure 6B
HeLa cells stable expressing GFP-NLS and LEM2-mCh were transected with the indicated siRNA and later with the inndicated rescue plasmid. The fraction of n HA-positive cells displaying LEM2-mCh clusterinng were scored.
E1, E2, E3 are means of 3 independent experiments
	siRNA	CTRL	C7si1	C7si1	C7si1	C7si1	C7si1
	Rescue			HA-CHMP7r	HA-CHMP7r	HA-CHMP7r	HA-CHMP7r
					S3A/S441A	S3D/S441D	S3E/S441E
	E1	5.52381	55.6479	21.6071	71.1401	9.16667	9.94108
	E2	5.22409	48.7912	14.0476	53.7211	12.5375	1.47569
	E3	2.26263	71.5533	13.3049	64.6078	13.6869	4.46429
	MEAN	4.33684	58.6641	16.3199	63.1563	11.797	5.29369
	STDEV	1.80256	11.677	4.59392	8.79977	2.34931	4.2932
	SEM	1.04071	6.74172	2.6523	5.08055	1.35638	2.47868
